# Supplementary material for: Trichosanthin Promotes Anti-Tumor Immunity through Mediating Chemokines and Granzyme B Secretion in Hepatocellular Carcinoma
Source: MDPI journal article supplement (doi:10.3390/ijms24021416), 2023-01-11
Supplement: s1 [file s1]

## Supplementary Materials:

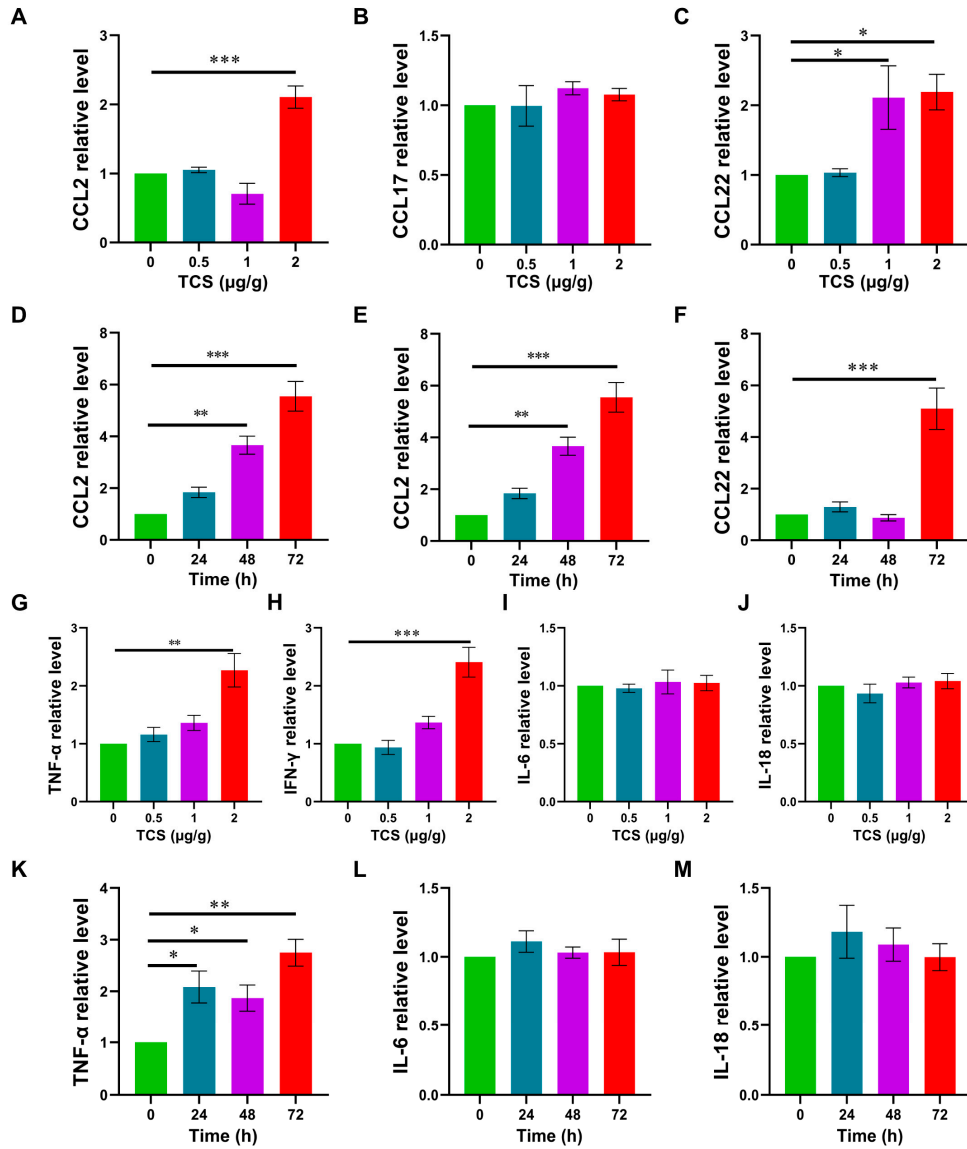

**Figure S1.** mRNA expression of CCL2, CCL17, CCL22, TNF- $\alpha$ , IFN- $\gamma$ , IL-6, and IL-18. (A-C) RT-qPCR method detected mRNA levels of CCL2, CCL17 and CCL22 in HCC tissues treated with different doses of TCS (0, 0.5, 1 and 2  $\mu$ g/g), GAPDH as the internal reference gene; (D-F) RT-qPCR method detected the mRNA levels of CCL2, CCL17 and CCL22 in H22 HCC cells treated with 25  $\mu$ g/g TCS after 24h, 48h and 72h, GAPDH as the internal reference gene; (G-J) RT-qPCR method detected the mRNA levels of TNF- $\alpha$ , IFN- $\gamma$ , IL-6, and IL-18 in HCC tissues treated with different doses of TCS (0, 0.5, 1 and 2  $\mu$ g/g), GAPDH as the internal reference gene; (K-M) RT-qPCR method detected the mRNA levels of TNF- $\alpha$ , IL-6, and IL-18 in H22 HCC cells treated with 25  $\mu$ g/g TCS after 24h, 48h and 72h, GAPDH as the internal reference gene. \*,  $p < 0.05$ ; \*\*,  $p < 0.01$ ; \*\*\*,  $p < 0.001$ .

**Table S1.** The antibody information in this study.

|                                                       | <b>Clones</b>                | <b>Manufacturer</b>         | <b>Host / Isotype</b> | <b>Conjugation</b>                 |
|-------------------------------------------------------|------------------------------|-----------------------------|-----------------------|------------------------------------|
| Caspase 3                                             | Polyclonal antibody          | Cell Signaling, cat# 9662   | Rabbit / IgG          | Unconjugated                       |
| Caspase 8                                             | Polyclonal antibody          | Abclonal, A0215             | Rabbit / IgG          | Unconjugated                       |
| Caspase 9                                             | Polyclonal antibody          | Abclonal, A7523             | Rabbit / IgG          | Unconjugated                       |
| Cleaved-caspase 3                                     | Monoclonal antibody (5A1E)   | Cell Signaling, cat# 9664T  | Rabbit / IgG          | Unconjugated                       |
| Cleaved-caspase 8                                     | Monoclonal antibody (D5B2)   | Cell Signaling, cat# 8592T  | Rabbit / IgG          | Unconjugated                       |
| Cleaved-caspase 9                                     | Polyclonal antibody          | Cell Signaling, cat# 9509T  | Rabbit / IgG          | Unconjugated                       |
| Granzyme B                                            | Monoclonal antibody (D2H2F)  | Cell Signaling, cat# 17215S | Rabbit / IgG          | Unconjugated                       |
| M6PR                                                  | Monoclonal antibody (D3V8C)  | Cell Signaling, cat# 14364S | Rabbit / IgG          | Unconjugated                       |
| LC3B                                                  | Polyclonal antibody          | Cell Signaling, cat# 2775S  | Rabbit / IgG          | Unconjugated                       |
| P62                                                   | Polyclonal antibody          | Proteintech, 18420-1-AP     | Rabbit / IgG          | Unconjugated                       |
| GAPDH                                                 | Monoclonal antibody (1E6D9)  | Proteintech, 60004-1-Ig     | Mouse/IgG2b           | Unconjugated                       |
| PARP                                                  | Monoclonal antibody (46D11)  | Cell Signaling, cat# 9532   | Rabbit / IgG          | Unconjugated                       |
| Cleaved PARP                                          | Polyclonal antibody          | Cell Signaling, cat# 9544   | Rabbit / IgG          | Unconjugated                       |
| Ki-67                                                 | Monoclonal antibody (D3B5)   | Cell Signaling, cat# 9129   | Rabbit / IgG          |                                    |
| CoraLite® Plus 488-conjugated CD8 Monoclonal antibody | Monoclonal antibody (1G2B10) | Proteintech, CL488-66868    | Mouse / IgG1          | CoraLite® Plus 488 Fluorescent Dye |

|                                                                 |                              |            |                            |              |                     |
|-----------------------------------------------------------------|------------------------------|------------|----------------------------|--------------|---------------------|
| Donkey<br>Rabbit<br>Highly<br>Adsorbed<br>Secondary<br>Antibody | anti-<br>IgG (H+L)<br>Cross- | Polyclonal | ThermoFisher<br>Scientific | Donkey / IgG | Alexa Fluor™<br>555 |
|-----------------------------------------------------------------|------------------------------|------------|----------------------------|--------------|---------------------|

**Table S2.** Sequences of primers for real-time PCR.

|               | Primer               | Sequence (5' to 3')     |
|---------------|----------------------|-------------------------|
| CCL2          | CCL2-qPCR-F          | TTAAAAACCTGGATCGGAACCAA |
|               | CCL2-qPCR-R          | GCATTAGCTTCAGATTTACGGGT |
| CCL22         | CCL22-qPCR-F         | AGGTCCCTATGGTGCCAATGT   |
|               | CCL22-qPCR-R         | CGGCAGGATTTTGAGGTCCA    |
| CCL17         | CCL17-qPCR-F         | TACCATGAGGTCACCTCAGATGC |
|               | CCL17-qPCR-R         | GCACTCTCGGCCTACATTGG    |
| IFN- $\gamma$ | IFN $\gamma$ -qPCR-F | ATGAACGCTACACACTGCATC   |
|               | IFN $\gamma$ -qPCR-R | CCATCCTTTTGCCAGTTCCTC   |
| IL18          | IL18-qPCR-F          | GACTCTTGCGTCAACTTCAAGG  |
|               | IL18-qPCR-R          | CAGGCTGTCTTTTGTC AACGA  |
| IL-6          | IL6-qPCR-F           | TAGTCCTTCCTACCCCAATTTCC |
|               | IL6-qPCR-R           | TTGGTCCTTAGCCACTCCTTC   |
| TNF- $\alpha$ | TNF $\alpha$ -qPCR-F | CCTGTAGCCACGTCGTAG      |
|               | TNF $\alpha$ -qPCR-R | GGGAGTAGACAAGGTACAACCC  |
| GAPDH         | GAPDH-qPCR-F         | AGGTCGGTGTGAACGGATTTG   |
|               | GAPDH-qPCR-R         | TGTAGACCATGTAGTTGAGGTCA |
